# Supplementary material for: Synergistic strategies for defluoridation from RECl3–AlCl3–F complex solution: pH regulation and hydrolysis coprecipitation of aluminum by Ca2Al(OH)6Cl·2H2O
Source: Royal Society of Chemistry journal article supplement (doi:10.1039/d4nj04716h), 2025-01-01
Supplement: d4nj04716h1.pdf [file d4nj04716h1.pdf]

Supplementary Information for

**“Synergistic strategies for defluoridation from RECl<sub>3</sub>-AlCl<sub>3</sub>-F complex solution: pH regulation and hydrolysis coprecipitation of aluminum by Ca<sub>2</sub>Al(OH)<sub>6</sub>Cl·2H<sub>2</sub>O”**

**Jikai Zhang<sup>a,b,d</sup>, Ping Li<sup>b,c,\*</sup>, Xindi Guan<sup>a,b</sup>, Hailin Zhang<sup>c</sup>, Yunwu Han<sup>b</sup>,  
Qingqing Chang<sup>b</sup>, Jiachun Xiong<sup>b</sup>, Qian Li<sup>b</sup>, Jie Tang<sup>b</sup>, Youming Yang<sup>a</sup>, Shili  
Zheng<sup>c</sup>**

<sup>a</sup> School of Metallurgy Engineering, Jiangxi University of Science and Technology, Ganzhou 341000, People’s Republic of China

<sup>b</sup> Jiangxi Province Key Laboratory of Cleaner Production of Rare Earths, Ganjiang Innovation Academy, Chinese Academy of Sciences, Ganzhou 341119, People’s Republic of China

<sup>c</sup> Key Laboratory of Green Process and Engineering, National Engineering Research Center of Green Recycling for Strategic Metal Resources, Institute of Process Engineering, Chinese Academy of Sciences, Beijing 100190, People’s Republic of China

<sup>d</sup> Ganzhou Nonferrous Metallurgy Research Institute Co., Ltd, Ganzhou 341000, People’s Republic of China

Supporting Information: 19 Pages, 9 Figures, and 6 Tables.

---

\* Corresponding author.  
E-mail address: lipinggnipil@ipe.ac.cn (P. Li).

## Part 1.1 Determination of fluorine concentration in solution <sup>1,2</sup>

**Determination of the actual response slope S value of the electrode:** After the reference electrode, fluoride electrode and ion meter were securely connected, the potential values of standard solutions were measured with varying fluorine concentrations at room temperature (see Table P1). The calibration curve for the actual response slope S value of the electrode was shown in Fig. P1, showing that  $-\lg c(F)$  was directly proportional to the potential ( $E$ ), and it can be seen from Nernst equation that  $S=58.232$ .

Measurement procedure: Prepare a known volume of test solution, add 20 ml of total ionic strength adjustment buffer (TISAB) and dilute with deionized water to 50 ml to form the test solution. Measure the initial potential and the potential after the addition of the standard solution. Substitute  $\Delta E=E_x-E_1$  into the following formula of the standard addition method to determine the concentration of F in the test solution.

**Measurement procedure:** Prepare a known volume of the test solution, add 20 ml of total ion strength adjustment buffer (TISAB), and dilute with deionized water to 50 ml to form the test solution. Measure the initial potential and the potential after the addition of standard solution. Substitute  $\Delta E=E_x-E_1$  into the following standard addition method formula to determine the concentration of F in the test solution.

$$c(F)_x = \frac{nV_s c(F)_s}{V_x(10^{\Delta E/S} - 1)} \quad (1)$$

Where:

$c(F)_x$  represents the concentration of the test solution, mg/L;

$V_s$  is the volume of the fluoride standard solution added, mL;

$c(F)_s$  is the concentration of the fluorine standard solution, mg/L;

$V_x$  is the volume of the test solution, mL;

$\Delta E$  is the potential difference, mV;

S is the electrode response slope;

$n$  indicates the dilution ratio.

**Table P1.** Electrode potential measured at different mass concentrations of F.

| C/(mg/L) | 0.5   | 1     | 5     | 10    | 20    | 50    |
|----------|-------|-------|-------|-------|-------|-------|
| E/(mV)   | 254.7 | 238.1 | 197.3 | 180.2 | 162.6 | 139.2 |

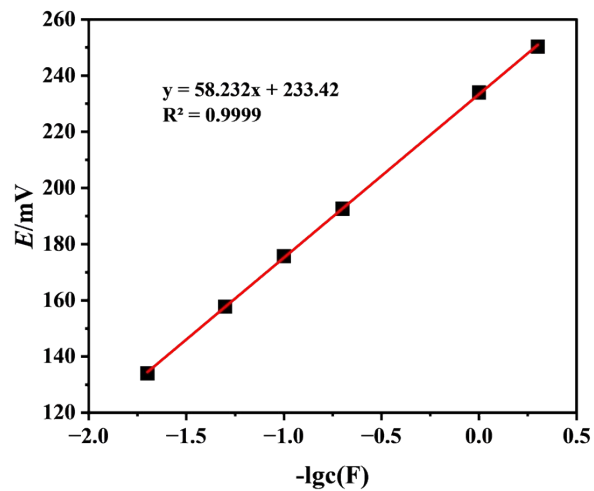

**Fig. P1.** Calibration curve of the actual response slope (S value) of the electrode.

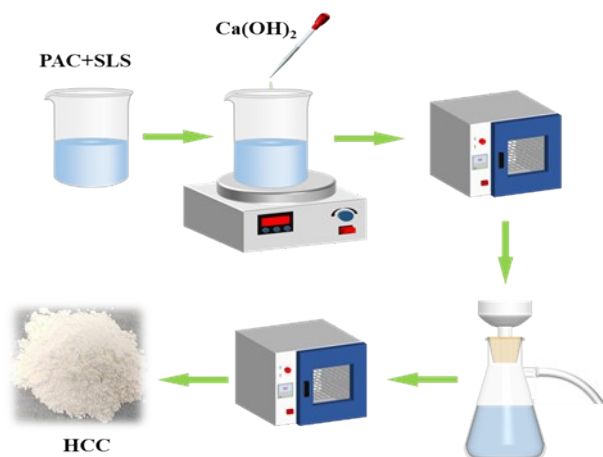

**Fig. S1.** Schematic flowchart of the synthesis route for HCC ( $\text{Ca}_2\text{Al}(\text{OH})_6\text{Cl}\cdot 2\text{H}_2\text{O}$ ).

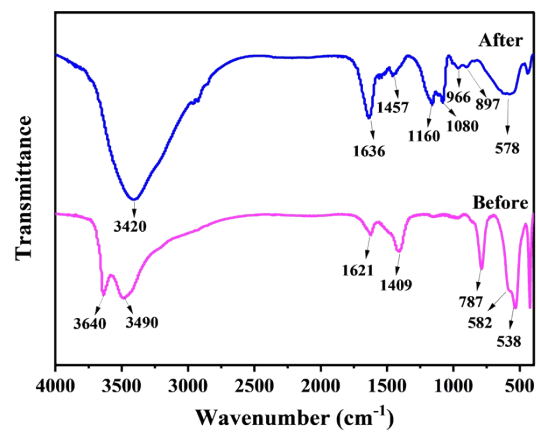

Fig. S2. FTIR spectrum of defluoridant before and after defluoridation.

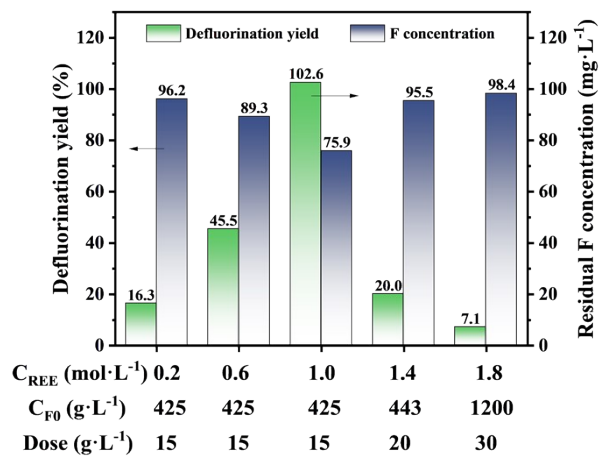

**Fig. S3.** Influence of REEs and F concentrations on defluoridation process.

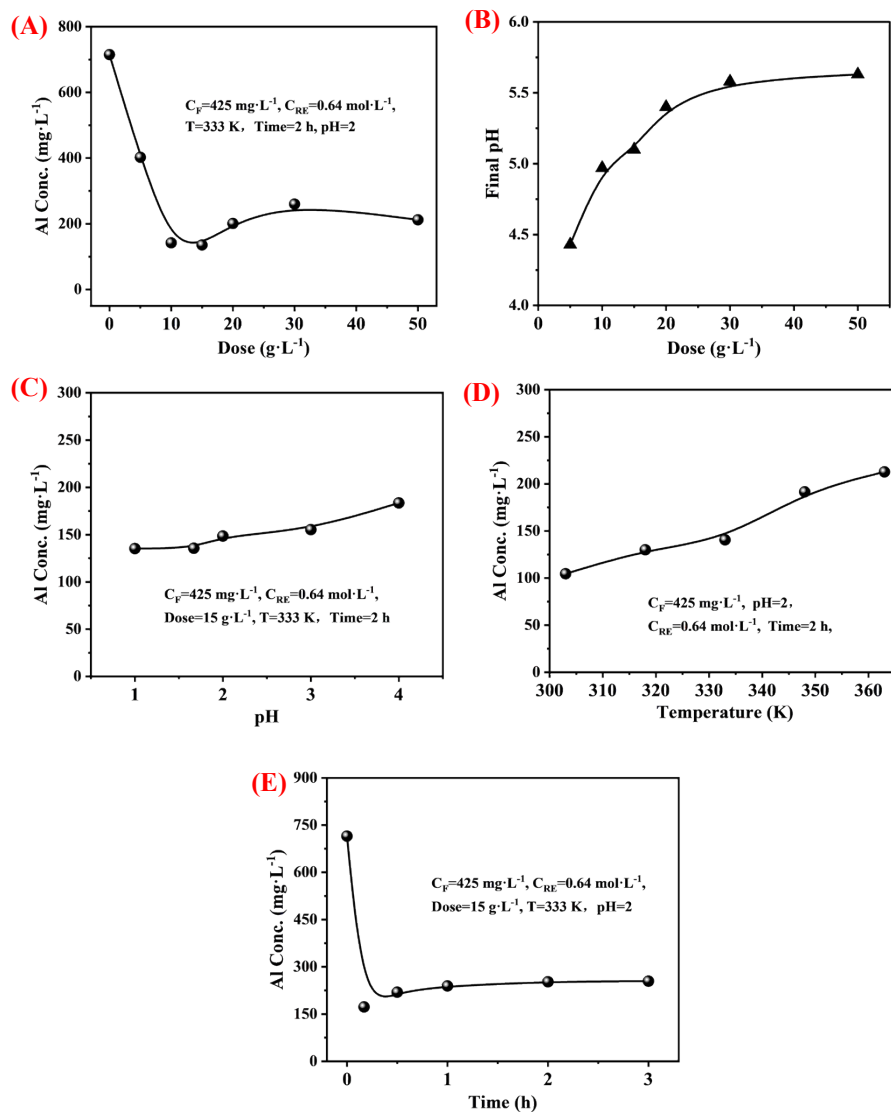

**Fig. S4.** Influence of factors on impurity Al, **(A)** Dose; **(B)** Dose for final pH; **(C)** Initial pH; **(D)** Temperature; and **(E)** Time.

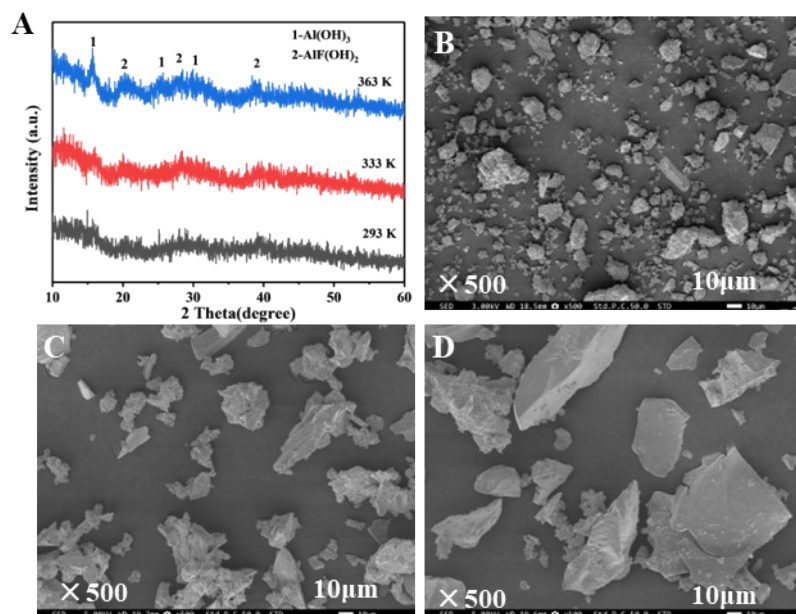

**Fig. S5.** Effect of temperature on defluoridation residue, (A) XRD spectrum. SEM, (B) 293K; (C) 333K; (D) 363K.



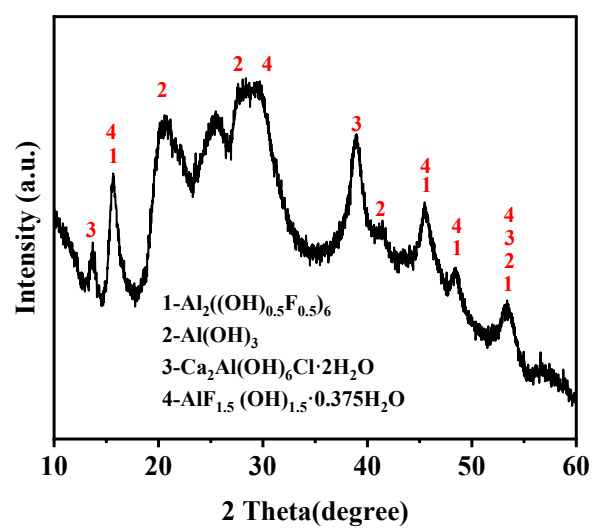

Fig. S6. XRD spectrum of defluorination residue.

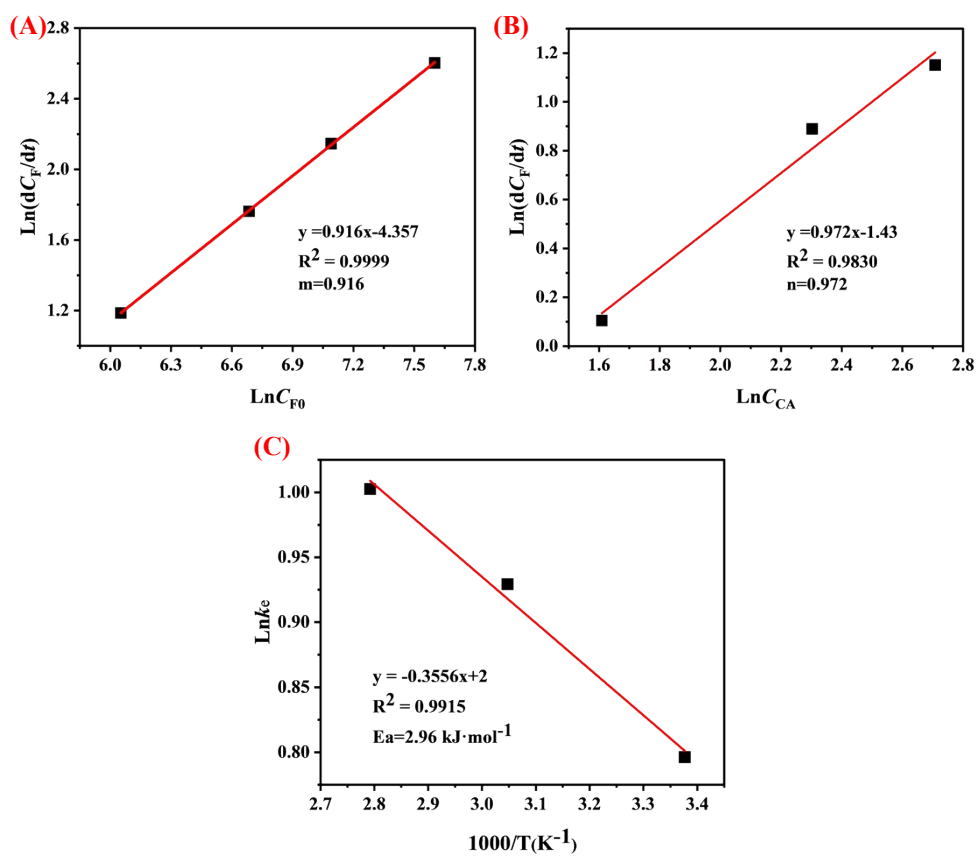

Fig. S7. Kinetic analysis of reaction orders, (A) m; (B) n; (C)  $\ln k_e$ - $1/T$  linear regression diagram.

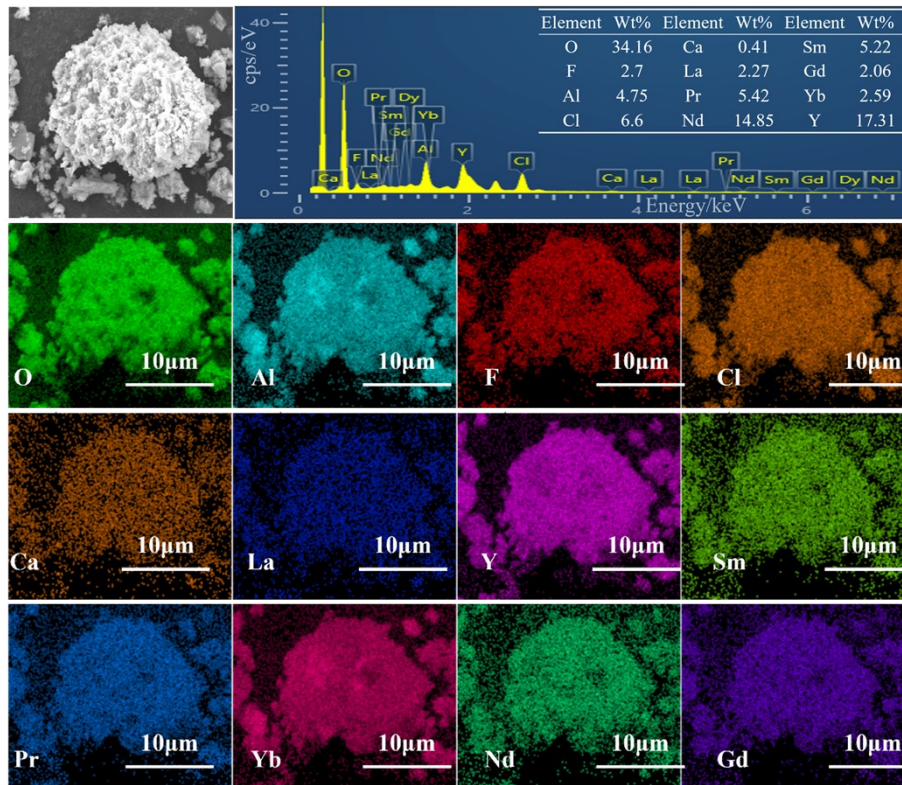

**Fig. S8.** SEM-EDS analysis of the defluoridation residue.

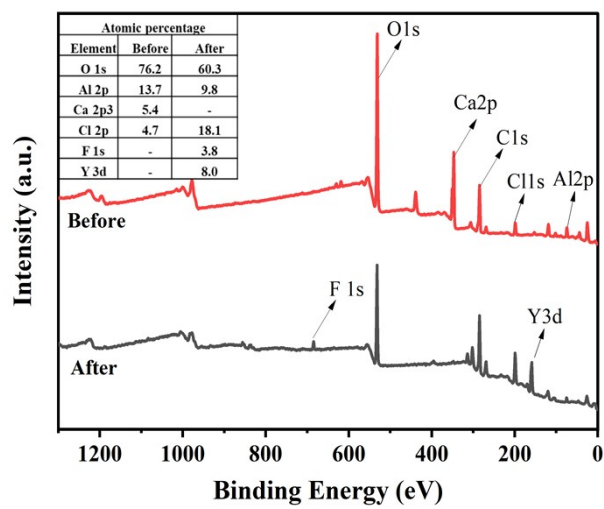

**Fig. S9.** XPS analysis of survey spectrum of the defluoridant before and after defluorination.

**Table S1**

XRF results of REO concentrate (TREO, total rare earths)

|            |                                |      |                                 |                                |                                |                 |                                |                                |                                |                               |                                |
|------------|--------------------------------|------|---------------------------------|--------------------------------|--------------------------------|-----------------|--------------------------------|--------------------------------|--------------------------------|-------------------------------|--------------------------------|
| Components | Al <sub>2</sub> O <sub>3</sub> | CaO  | CeO <sub>2</sub>                | Dy <sub>2</sub> O <sub>3</sub> | Er <sub>2</sub> O <sub>3</sub> | F               | Fe <sub>2</sub> O <sub>3</sub> | Gd <sub>2</sub> O <sub>3</sub> | Ho <sub>2</sub> O <sub>3</sub> | K <sub>2</sub> O              | La <sub>2</sub> O <sub>3</sub> |
| Conc. %    | 1.03                           | 1.31 | 1.75                            | 4.76                           | 2.64                           | 0.42            | 0.08                           | 4.37                           | 0.76                           | 0.12                          | 18.76                          |
| Components | Nd <sub>2</sub> O <sub>3</sub> | NiO  | Pr <sub>6</sub> O <sub>11</sub> | SiO <sub>2</sub>               | Sm <sub>2</sub> O <sub>3</sub> | SO <sub>3</sub> | Tb <sub>4</sub> O <sub>7</sub> | Tm <sub>2</sub> O <sub>3</sub> | Yb <sub>2</sub> O <sub>3</sub> | Y <sub>2</sub> O <sub>3</sub> | TREO                           |
| Conc. %    | 15.67                          | 0.22 | 4.1                             | 0.07                           | 3.57                           | 2.91            | 0.83                           | 0.31                           | 2.14                           | 34.09                         | 93.75                          |

**Table S2**

Major chemical compositions of the defluoridant by XRF.

| Components | CaO   | Al <sub>2</sub> O <sub>3</sub> | Cl    | SiO <sub>2</sub> | Fe <sub>2</sub> O <sub>3</sub> | MgO  | SO <sub>3</sub> |
|------------|-------|--------------------------------|-------|------------------|--------------------------------|------|-----------------|
| %          | 61.60 | 22.62                          | 11.36 | 2.61             | 0.87                           | 0.48 | 0.28            |

**Table S3**

The characterization of the prepared defluoridant.

| Defluoridant                                                           | BET surface area<br>( $\text{m}^2 \cdot \text{g}^{-1}$ ) | Pore volume<br>( $\text{cm}^3 \cdot \text{g}^{-1}$ ) | Pore size<br>(nm) |
|------------------------------------------------------------------------|----------------------------------------------------------|------------------------------------------------------|-------------------|
| $\text{Ca}_2\text{Al}(\text{OH})_6\text{Cl} \cdot 2\text{H}_2\text{O}$ | 11.81                                                    | 0.07                                                 | 25.46             |

**Table S4**

EDS results of initial Al/F ratio on the Al/F ratio in defluoridation residue

| Initial Al/F molar ratio                   |        | 0.5         |             |             |             | 1.2         |             |             |             |
|--------------------------------------------|--------|-------------|-------------|-------------|-------------|-------------|-------------|-------------|-------------|
| EDS of points                              |        | point 1     | point 2     | point 3     | point 4     | point 5     | point 6     | point 7     |             |
| Al/F molar ratio of defluoridation residue |        | <b>0.50</b> | <b>0.62</b> | <b>1.09</b> | <b>1.41</b> | <b>1.39</b> | <b>1.56</b> | <b>1.34</b> |             |
|                                            | O      | 37.75       | 77.68       | 48.00       | 34.48       | 38.57       | 41.50       | 47.74       |             |
| EDS (wt%)                                  | F      | 10.74       | 2.16        | 6.24        | 3.72        | 3.93        | 3.91        | 4.54        |             |
|                                            | Al     | 7.69        | 1.89        | 9.68        | 7.48        | 7.78        | 8.68        | 8.66        |             |
|                                            | others | 43.82       | 18.26       | 36.08       | 54.32       | 49.72       | 45.91       | 39.06       |             |
| Initial Al/F molar ratio                   |        | 2           |             |             |             | 3           |             |             |             |
| EDS of points                              |        | point 8     | point 9     | point 10    | point 11    | point 12    | point 13    | point 14    | point 15    |
| Al/F molar ratio of defluoridation residue |        | <b>1.82</b> | <b>1.70</b> | <b>2.01</b> | <b>2.14</b> | <b>2.62</b> | <b>3.33</b> | <b>4.26</b> | <b>8.07</b> |
|                                            | O      | 40.78       | 45.54       | 50.58       | 43.44       | 44.18       | 41.86       | 26.97       | 25.64       |
| EDS (wt%)                                  | F      | 3.54        | 4.43        | 3.35        | 3.87        | 2.29        | 1.85        | 0.62        | 1.41        |
|                                            | Al     | 9.16        | 10.73       | 9.55        | 11.77       | 8.53        | 8.72        | 3.75        | 16.16       |
|                                            | others | 46.52       | 39.31       | 36.53       | 40.91       | 45.0        | 47.57       | 68.66       | 56.79       |



**Table S5**

Assignments of main spectral bands based on the binding energy and the percentage of atomic.

| Atomic species | Before leaching |                | After leaching |                | Assignments      |
|----------------|-----------------|----------------|----------------|----------------|------------------|
|                | B.E.<br>(eV)    | Percent<br>(%) | B.E.<br>(eV)   | Percent<br>(%) |                  |
| Al2p           | 73.80           | 49.4           | 74.5           | 43.9           | Al-O             |
|                | 74.32           | 50.6           | 75.0           | 38.2           | Al-OH            |
|                | -               | -              | 75.7           | 17.9           | Al-F             |
| Total          |                 | 100            |                | 100            |                  |
| F1s            | -               | -              | 684.9          | 100            | Al-F-OH          |
| Total          |                 | -              |                | 100            |                  |
| O1s            | 530.6           | 19.0           | 531.0          | 24.3           | Me-O             |
|                | 531.36          | 74.5           | 532.1          | 68.0           | OH               |
|                | 532.9           | 6.5            | 533.4          | 7.8            | H <sub>2</sub> O |
| Total          |                 | 100            |                | 100            |                  |

**Table S6**Comparative analysis of defluoridation performance of  $\text{Ca}_2\text{Al}(\text{OH})_6\text{Cl}\cdot 2\text{H}_2\text{O}$  with other materials.

| Defluoridant                                                          | Hyperhaline solution | Capacity (mg/g) | Conditions                                                               | References |
|-----------------------------------------------------------------------|----------------------|-----------------|--------------------------------------------------------------------------|------------|
| $\text{Ca}_2\text{Al}(\text{OH})_6\text{Cl}\cdot 2\text{H}_2\text{O}$ | $\text{RECl}_3$      | 96.4%*          | $C_0=425$ mg/L, Time=2 h, Dosage=5 g/L, pH=2, T=333 K                    | This work  |
| Lanthanum carbonate                                                   | $\text{RECl}_3$      | 21.2            | $C_0=570$ mg/L, Time=2 h, Dosage=8 wt% (~27 g/L), pH=1, T=363 K          | 3          |
| $\text{CO}_2$                                                         | $\text{RECl}_3$      | 98.9%*          | $\text{CO}_2$ injection flow, 1000 L/h; 343 K; initial pH=1; Time=1.5 h  | 3          |
| Aluminum-based composite                                              | $\text{ZnSO}_4$      | 5.6             | $C_0=124$ mg/L, Dosage=15 g/L, pH=5.1, 323 K, Time=2.5 h                 | 4          |
| Amorphous porous layered- $\text{Al}_2\text{O}_3$                     | $\text{ZnSO}_4$      | 12.1            | $C_0=120$ mg/L, Dosage=10 g/L, pH=5.0, T=313 K, Time=2 h                 | 5          |
| Modified mayenite $\text{Ca}_{12}\text{Al}_{14}\text{O}_{33}$         | $\text{NaAlO}_2$     | 36.86           | $C_0=300$ mg/L, Caustic ratio: 1.6, Time=120 min, Dosage=20 g/L, T=353 K | 2          |

\* Defluoridation yield. (Since it is not an adsorption process, the adsorption isotherms cannot be obtained, so the fluoride removal yield is provided here.)

## References

- 1 C. J. Rix, A. M. Bond and J. D. Smith, *Anal. Chem.*, 1976, **48**, 1236–1239.
- 2 Y. Han, Q. Qin, Q. Chang, H. Zhang, J. Zhang, X. Guan, J. Xiong, Q. Li, J. Tang, G. Li and P. Li, *Sep. Purif. Technol.*, 2025, **353**, 128412.
- 3 D. Zhang, K. Gao, X. Zhang and M. Wang, *Minerals*, 2021, **12**, 31.
- 4 Z. Tian, W. Guo, Z. Zhang, Y. Lai, S. Ye and J. Li, *Hydrometallurgy*, 2017, **171**, 222–227.
- 5 K. Yang, Y. Li, Z. Zhao, Z. Tian and Y. Lai, *Chem. Eng. Res. Des.*, 2020, **153**, 562–571.
